## **Emergence and rapid global dissemination of CTX-M-15-associated *Klebsiella pneumoniae* strain ST307**

Kelly L. Wyres<sup>1a\*</sup>, Jane Hawkey<sup>1a\*</sup>, Marit A. K. Hetland<sup>2</sup>, Aasmund Fostervold<sup>2,3</sup>, Ryan R. Wick<sup>1</sup>, Louise M. Judd<sup>1</sup>, Mohammad Hamidian<sup>4</sup>, Benjamin P. Howden<sup>5</sup>, Iren H. Löhr<sup>2b</sup>, Kathryn E. Holt<sup>1,6b</sup>

<sup>1</sup> Department of Biochemistry and Molecular Biology, Bio21 Molecular Science and Biotechnology Institute, University of Melbourne, Parkville, VIC, Australia

<sup>2</sup> Department of Medical Microbiology, Stavanger University Hospital, Stavanger, Norway

<sup>3</sup> Department of Clinical Science, University of Bergen, Bergen, Norway

<sup>4</sup> The ithree Institute, University of Technology Sydney, Ultimo, NSW, Australia

<sup>5</sup> Microbiological Diagnostic Unit Public Health Laboratory, Department of Microbiology and Immunology, University of Melbourne at The Peter Doherty Institute for Infection and Immunity, Parkville, VIC, Australia

<sup>6</sup> London School of Hygiene and Tropical Medicine, London, UK

<sup>a/b</sup> These authors contributed equally to this work.

\*corresponding authors

Corresponding author details:

kwyres@unimelb.edu.au; jane.hawkey@unimelb.edu.au

Department of Biochemistry and Molecular Biology, Bio21 Molecular Science and Biotechnology Institute, University of Melbourne, Parkville, Australia

### **Abstract**

Recent reports indicate the emergence of a new carbapenemase producing *Klebsiella pneumoniae* clone, ST307. Here we show that ST307 emerged in the mid-1990s (nearly 20 years prior to its first report), is already globally distributed and is intimately associated with a conserved plasmid harbouring the *bla*<sub>CTX-M-15</sub> extended-spectrum beta-lactamase (ESBL) gene plus other antimicrobial resistance determinants. Our findings support the need for enhanced surveillance of this widespread ESBL clone in which carbapenem resistance is now emerging.

### **Key words**

*Klebsiella pneumoniae*; antimicrobial resistance; ST307; genomic epidemiology

## **Background**

Several reports have indicated the recent emergence of a new multi-drug resistant (MDR) *Klebsiella pneumoniae* (*Kp*) clone, ST307. We have recently generated data suggesting that ST307 is becoming an important cause of extended-spectrum beta-lactamase (ESBL) producing *Kp* infections in Norway (unpublished), and others have reported it as an emerging cause of carbapenemase-producing *Kp* infections [1–3].

Here we summarise the available literature and investigate 95 ST307 whole-genome sequences to better understand the emergence and molecular epidemiology of this clone and identify the antimicrobial resistance (AMR) genes with which it is associated.

## **Growing reports of ST307 infections**

The oldest recorded ST307 isolate was collected in The Netherlands in 2008 (*Kp* MLST database; [bigsdb.pasteur.fr/klebsiella/klebsiella.html](https://bigsdb.pasteur.fr/klebsiella/klebsiella.html)). The earliest clinical strain reported in the literature was collected in Pakistan in 2009 [4] and was followed by sporadic isolations across Europe, Asia, Africa and the Americas (summarised in **Table S1** and **Figure 1**). Several reports have indicated local dissemination of ST307 harbouring *K. pneumoniae* carbapenemase (KPC) genes, *bla*<sub>KPC-2</sub> or *bla*<sub>KPC-3</sub> [3,5,6], while an analysis of >1700 ESBL-producing *Kp* from a hospital network in Texas, USA found high prevalence of *bla*<sub>CTX-M-15</sub>-positive ST307 strains, ~1/3 of which also carried *bla*<sub>KPC</sub> genes [1]. This was consistent with other reports that *bla*<sub>CTX-M-15</sub> is common in ST307 [1–4,7]. Aside from *bla*<sub>KPC</sub> genes, carbapenem resistance conferred by NDM-1 or OXA-48 carbapenemases has been reported [1–3,7,8], as has resistance to the novel beta-lactam-inhibitor combination, ceftazidime-avibactam [9], and colistin [8,10].

## **ST307 genome data and analysis**

We collected 504 published and 37 newly sequenced ST307 genomes representing 11 countries on five continents. For the latter, 150 or 250 bp PE reads were generated on the Illumina MiSeq platform as described previously [11]. Norwegian isolate collection was approved by REC West (Norway) ethics committee (application ID: 2017/1185). The oldest isolate (Kp616 from Iran, 2009) was also subjected to long read Oxford Nanopore sequencing and hybrid genome assembly using *Unicycler* v0.4.4 [12,13]. The completed Kp616 genome comprised a 5,246,307 bp chromosome plus two plasmids (pKp616\_1, 58 kbp; pKp616\_2, 55 kbp; GenBank accession GCA\_003076555.1). All sample information, accession numbers and citations are listed in **Table S2**.

A core chromosomal single nucleotide variant (SNV) alignment was generated using *RedDog* (reference: Kp616 chromosome) as described in [11]. Recombination was removed using *Gubbins* [14]. A preliminary tree using *FastTree* [15] indicated the majority of strains from Texas (n=451/468, 96.4%) formed a distinct monophyletic clade, hence we randomly selected one isolate per year to represent this clade in comparative analyses. The final recombination-free alignment of 1,465 SNVs in 95 genomes was subjected to Bayesian phylogenetic analysis using *BEAST2* v2.4.7 [16] as described in [11] (**Figure 2**). A GTR, relaxed clock, constant population size model

was determined to be the best fit and we confirmed a strong temporal signal by date-randomisation and linear regression (**Figure S1**).

### ***ST307 emerged in the mid-1990s and has disseminated globally***

We estimate that ST307 emerged in 1994 (95% HPD, 1974–2006), close to the emergence date estimated previously for ST258 [17], despite the fact that the latter was reported in the literature and recognised as a disseminated clone more than a decade earlier than ST307 [18]. The estimated mutation rate for ST307 ( $1.18 \times 10^{-6}$  substitutions site<sup>-1</sup> year<sup>-1</sup>, 95% HPD,  $8.01 \times 10^{-7}$ – $1.58 \times 10^{-6}$ ; **Figure S1**) was also remarkably similar to that estimated previously for ST258 [17].

The phylogeny revealed two deep-branching lineages, one of which has become globally distributed, comprising genomes from the Americas, Asia, Australia, the Middle East and Europe (**Figure 2**). Within this lineage there was evidence of transfer of ST307 between countries, and for all countries with >3 genomes there were multiple clusters within the global lineage. The countries with the highest representation were distributed most broadly (Norway, n=30; USA, n=22; UK, n=22), suggesting that the same patterns would likely be detected for most countries if sampling was increased (**Figure 2**). The second lineage included only subsampled strains from Texas (2011-2015), indicating that the majority of the hundreds of infections attributed to ST307 in [1] resulted from prolonged local transmission of this clade. Texan isolates were also found in the global lineage, suggesting that the USA may be a potential origin for ST307, as most of its genetic diversity was present in that location.

### ***ST307 virulence and antimicrobial resistance genes***

We used *Kleborate* [19] to investigate the prevalence of acquired AMR and virulence determinants and *Kaptive* [20] to investigate capsule (K) and lipopolysaccharide (O) locus diversity. We detected no evidence of the *Kp* virulence plasmid [21], but a minority of genomes (n=12, 12.6%) harboured the yersiniabactin siderophore locus located within three distinct chromosomally integrated ICE*Kp* variants. The distribution of ICE*Kp* insertions on the ST307 core genome tree indicated >4 independent acquisitions with limited expansion of recipient sublineages (**Figure 2**), consistent with the patterns recently reported for ST258 and other common MDR *Kp* clones [19]. Unlike those other clones [17,22], all ST307 shared the same capsule (KL107) and O antigen (O2v2) loci. An additional putative capsule synthesis locus (*Kp616* genes C2861\_20465 to C2861\_20520 [2]), which is unlike any known K-locus, was also conserved among ST307 but is rare among the broader *Kp* population (data not shown).

In contrast to the virulence loci, acquired AMR genes were highly prevalent; 93 (97.9%) isolates carried acquired resistance determinants associated with  $\geq 3$  drug classes (**Table S2**). The ParC 80I and GyrA 83I fluoroquinolone resistance-associated mutations were conserved in all genomes. The *bla*<sub>CTX-M-15</sub> ESBL gene was found in 89 (93.7%) genomes, and 81 (85.3%) harboured it in combination with *sul2*, *dfrA14* and *strAB* with/without *aac(3)-IIa*, which were all linked to an MDR plasmid (see below).

*bla*<sub>KPC5</sub> and other AMR genes were occasionally identified (see **Figure 2** and **Table S2**).

For the majority of genomes carrying *bla*<sub>CTX-M-15</sub> (n=88/89) BLASTn confirmed that this gene was located downstream of *ISEcp1*, which forms a transposon to mobilise *bla*<sub>CTX-M-15</sub> and promotes its expression [23]. Four complete ST307 IncFII<sub>k</sub>/IncFIB<sub>k</sub> *bla*<sub>CTX-M-15</sub> plasmids have been published [2], and share an insertion of the *ISEcp1/bla*<sub>CTX-M-15</sub> transposon within Tn3. Read-mapping to pKPN3-307\_typeA (accession KY271404) and assembly graph inspections of our *bla*<sub>CTX-M-15</sub>-positive genomes showed that all carried the same *ISEcp1/bla*<sub>CTX-M-15</sub> transposon. In 84/89 cases, the same pKPN3-307\_typeA plasmid backbone was present and *ISEcp1/bla*<sub>CTX-M-15</sub> was located in the same site within Tn3, consistent with conservation of the same ESBL plasmid (**Figure S2**). The exceptions were: (i) an Australian isolate (13GNB-468) had the *ISEcp1/bla*<sub>CTX-M-15</sub> transposon inserted in the chromosomal gene *feoB*; (ii) Kp616 carried no pKPN3-307\_typeA-like plasmid but harboured *bla*<sub>CTX-M-15</sub> on an IncN plasmid; and (iii) the five representatives of the Texan-specific lineage carried two chromosomal insertions of the *ISEcp1/bla*<sub>CTX-M-15</sub> transposon (within Kp616 loci C2861\_02545 and C2861\_22795). This coupled with the additional GyrA 87N fluoroquinolone resistance mutation in the Texan lineage may have contributed to its prolonged transmission in the hospital setting. Regardless of these exceptions, the level of plasmid conservation in ST307 is remarkable, mirroring the association of ST258 with the *bla*<sub>KPC</sub> pKpQIL plasmid [17] and suggesting that the plasmid confers limited fitness cost to the host (although plasmid-positive, *bla*<sub>CTX-M-15</sub>-negative genomes were observed, **Table S2**).

### Conclusions

Complementing the increasing reports in the literature, our analyses reveal that ST307 is a highly successful MDR clone that shares many traits with ST258, but is closely associated with *bla*<sub>CTX-M-15</sub> rather than *bla*<sub>KPC5</sub>. With sufficient exposure ST307 can acquire and disseminate carbapenemases [1–3], and likely other clinically important AMR determinants. ST307 appears to be readily transferred between countries and has already become globally disseminated, yet has remained largely unnoticed for almost 20 years. These findings indicate an urgent need for enhanced surveillance of MDR *Kp* to monitor ST307 alongside other well-known clones and detect emerging MDR threats.

### Acknowledgements

This work was supported by the Viertel Foundation of Australia, the NHMRC of Australia (fellowship #GNT1105905 to BPH), The Western Norway Regional Health Authority (fellowship 912037 and 912119, and grant number 912050) and the Bill and Melinda Gates Foundation, Seattle. We thank; The Norwegian Surveillance System for Antimicrobial Drug Resistance (NORM) for data sharing; The Norwegian *Klebsiella pneumoniae* study group for collection of Norwegian isolates; Dr Mohammad Ali Boroumand for collection of the Iranian isolate; the Australian Group on Antimicrobial Resistance (AGAR) in particular Jan Bell, for providing isolates from Australia, and the staff at MDU Public Health Laboratory for sequencing Australian isolates.

### **Author contributions**

KLW, JH, IHL and KEH conceived the study and performed data analyses. MAKH performed systematic literature review. AF, IHL, MH and BPH provided isolates and/or genome data. RRW and LMJ generated the completed reference genome. KLW, JH and KEH wrote the paper. All authors contributed to data interpretation, read and commented on the manuscript.

### **Conflicts of interest**

None declared.

### **References**

1. Long SW, Olsen RJ, Eagar TN, Beres SB, Zhao P, Davis J, et al. Population genomic analysis of 1,777 extended-spectrum beta-lactamase-producing *Klebsiella pneumoniae* isolates, Houston, Texas: Unexpected abundance of clonal group 307. *mBio*. 2017;8(3):e00489-17.
2. Villa L, Feudi C, Fortini D, Brisse S, Passet V, Bonura C, et al. Diversity , virulence , and antimicrobial resistance of the KPC- producing *Klebsiella pneumoniae* ST307 clone. *MGen*. 2017;3.
3. Ocampo AM, Chen L, Cienfuegos A V, Roncancio G, Chavda KD, Kreiswirth BN. A two-year surveillance in five Colombian tertiary care hospitals reveals high frequency of non-CG258 clones of carbapenem-resistant *Klebsiella pneumoniae* with distinct clinical characteristics. *Antimicrob Agents Chemother*. 2016;60(1):332–42.
4. Habeeb MA, Haque A, Nematzadeh S, Iversen A, Giske CG. High prevalence of 16S rRNA methylase RmtB among CTX-M extended-spectrum  $\beta$ -lactamase-producing *Klebsiella pneumoniae* from Islamabad, Pakistan. *Int J Antimicrob Agents*. 2013;41(6):524–6.
5. Bonura C, Giuffrè M, Aleo A, Fasciana T, Di Bernardo F, Stampone T, et al. An update of the evolving epidemic of *bla*KPC carrying *Klebsiella pneumoniae* in Sicily, Italy, 2014: Emergence of multiple non-ST258 clones. *PLoS One*. 2015;10(7):e0132936.
6. Yoon E, Yang JW, Kim JO, Lee H, Lee KJ. Carbapenemase-producing Enterobacteriaceae in South Korea: a report from the National Laboratory Surveillance System. *Futur Microbiol*. 2018;Epub ahead of print.
7. Yoon E, Kang DY, Yang JW, Kim D, Lee H, Lee KJ, et al. New Delhi metallo-beta-lactamase- producing Enterobacteriaceae in South Korea between 2010 and 2015. *Front Genet*. 2018;9:571.
8. Novovic K, Trudic A, Brkic S, Vasiljevic Z, Kojic M, Medic D, et al. Molecular epidemiology of colistin- resistant, carbapenemase-producing *Klebsiella pneumoniae* in Serbia from 2013 to 2016. *Antimicrob Agents Chemother*. 2017;61(5):1–6.
9. Giddins MJ, Macesic N, Annavajhala MK, Stump S, Khan S, McConville TH, et al. Successive emergence of ceftazidime-avibactam resistance through distinct genomic adaptations in *bla*KPC2-harboursing *Klebsiella pneumoniae* sequence type 307 isolates. *Antimicrob Agents Chemother*. 2018;62(3):1–8.
10. Saavedra S, Diaz L, Wiesner M, Correa A, Arévalo S, Reyes J, et al. Genomic and molecular characterization of clinical isolates of Enterobacteriaceae

- harboring *mcr-1* in Colombia, 2002 to 2016. *Antimicrob Agents Chemother.* 2017;61(12):e00841-17.
11. Lam MMC, Wyres KL, Duchêne S, Wick RR, Judd LM, Gan Y, et al. Population genomics of hypervirulent *Klebsiella pneumoniae* clonal group 23 reveals early emergence and rapid global dissemination. *Nat Commun.* 2018;in press.
  12. Wick RR, Judd LM, Gorrie CL, Holt KE. Unicycler: resolving bacterial genome assemblies from short and long sequencing reads. *PLoS Comp Biol.* 2017;13(6):e1005595.
  13. Wick RR, Judd LM, Gorrie CL, Holt KE. Completing bacterial genome assemblies with multiplex MinION sequencing. *MGen.* 2017;3.
  14. Croucher NJ, Page AJ, Connor TR, Delaney AJ, Keane JA, Bentley SD, et al. Rapid phylogenetic analysis of large samples of recombinant bacterial whole genome sequences using Gubbins. *Nucleic Acids Res.* 2015;43(3):e15.
  15. Price MN, Dehal PS, Arkin AP. FastTree: computing large minimum evolution trees with profiles instead of a distance matrix. *Mol Biol Evol.* 2009;26(7):1641–50.
  16. Bouckaert R, Heled J, Kühnert D, Vaughan T, Wu CH, Xie D, et al. BEAST 2: A software platform for Bayesian evolutionary analysis. *PLoS Comp Biol.* 2014;10(4):e1003537.
  17. Bowers JR, Kitchel B, Driebe EM, MacCannell DR, Roe C, Lemmer D, et al. Genomic analysis of the emergence and rapid global dissemination of the clonal group 258 *Klebsiella pneumoniae* pandemic. *PLoS One.* 2015;10(7):e0133727.
  18. Kitchel B, Rasheed JK, Patel JB, Srinivasan A, Navon-Venezia S, Carmeli Y, et al. Molecular epidemiology of KPC-producing *Klebsiella pneumoniae* isolates in the United States: clonal expansion of multilocus sequence type 258. *Antimicrob Agents Chemother.* 2009;53(8):3365–70.
  19. Lam MMC, Wick RR, Wyres KL, Gorrie C, Judd M, Brisse S, et al. Genetic diversity, mobilisation and spread of the yersiniabactin-encoding mobile element ICEKp in *Klebsiella pneumoniae* populations *MGen.* 2018; in press.
  20. Wyres KL, Wick RR, Gorrie C, Jenney A, Follador R, Thomson NR, et al. Identification of *Klebsiella* capsule synthesis loci from whole genome data. *MGen.* 2016;2(12).
  21. Ramirez MS, Traglia GM, Lin DL, Tran T, Tolmasky ME. Plasmid-mediated antibiotic resistance and virulence in gram-negatives: the *Klebsiella pneumoniae* paradigm. *Microbiol Spectr.* 2014;2(5):1–15.
  22. Wick RR, Heinz E, Holt KE, Wyres KL. Kaptive Web: user-friendly capsule and lipopolysaccharide serotype prediction for *Klebsiella* genomes. *J Clin Microbiol.* 2018;Advanced online publication.
  23. Bonnet R. Growing group of extended spectrum beta-lactamases: the CTX-M enzymes. *Antimicrob Agent Chemother.* 2004;48(1):1–14.



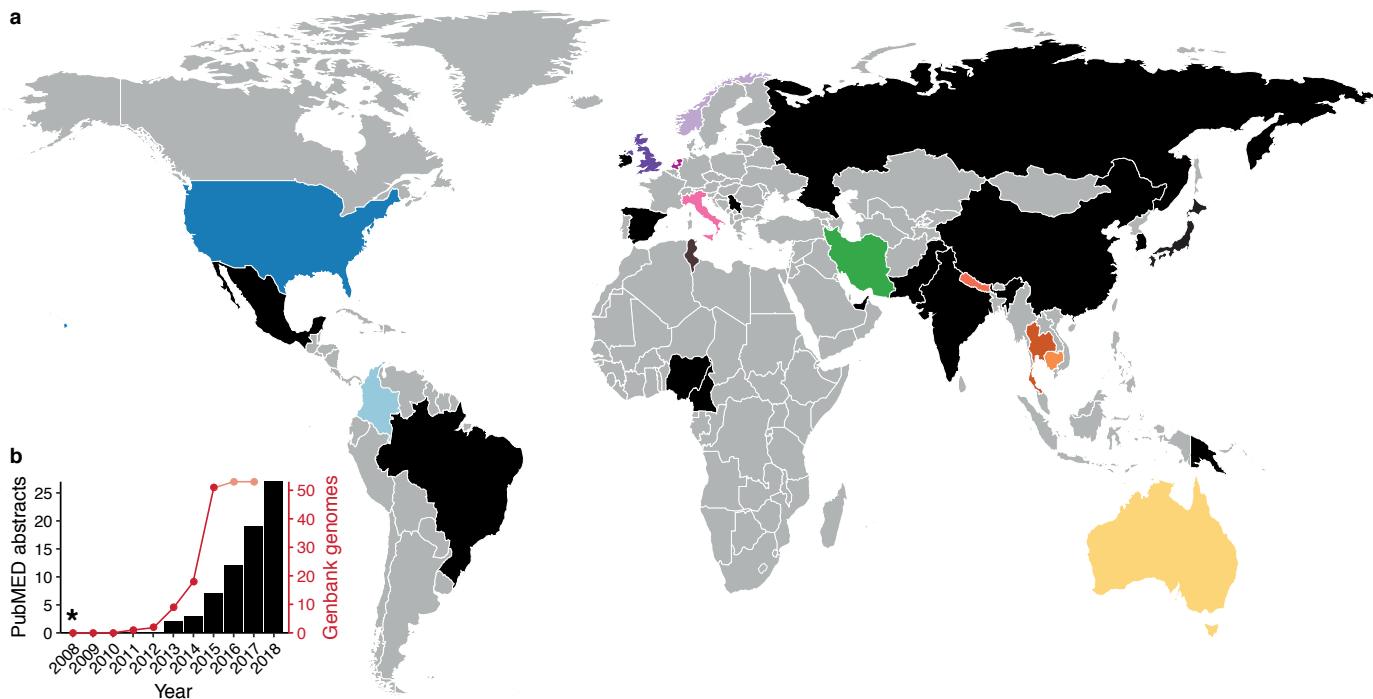

**Figure 1: Geographic distribution and increasing reports of ST307.** **a**, Countries of collection of ST307 isolates reported in the literature, international *K. pneumoniae* MLST database and/or for which genome data are available (also see **Table S1**). Countries for which corresponding isolate genomes were available for the current analysis are coloured as per **Figure 2**. All other countries from which ST307 has been reported are coloured black. **b**, Reports of ST307 in the literature and among genome assemblies deposited in Genbank. Black bars show the cumulative number of PubMed abstracts as of April 2018, identified using the search criteria “ST307” with/without “*Klebsiella pneumoniae*,” also see **Table S1**. Red/peach line shows the cumulative number of isolates for which genome assemblies are deposited in Genbank as of Dec 2017; note dates indicate year of isolate collection not date of deposition, hence peach line indicates values that will likely increase as further genomes are deposited. \*indicates the date of collection of the first ST307 isolate reported in the international MLST database.

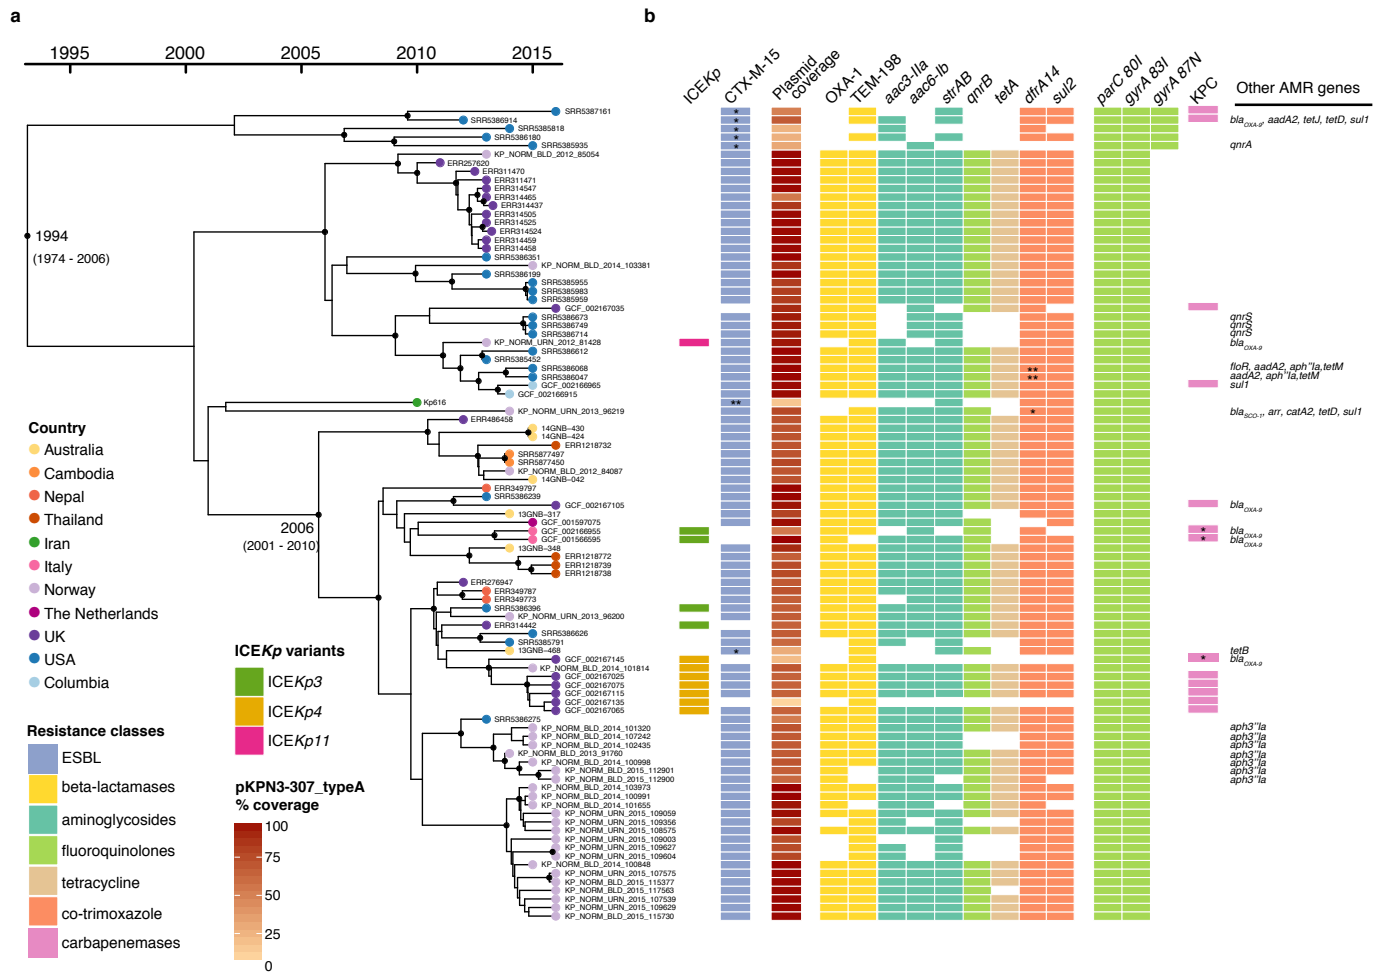

**Figure 2: Bayesian phylogeny of 95 ST307 isolates.** **a**, Dated phylogeny of ST307 isolates ( $n=95$ ), with tips coloured by country of isolation (as per inset legend and **Figure 1**). Black dots on internal nodes indicate  $\geq 95\%$  posterior probability. **b**, Presence of the yersiniabactin-carrying ICEKp elements (variants coloured as per inset legend), antimicrobial resistance genes (blocks coloured by drug class), and of the  $bla_{\text{CTX-M-15}}$  plasmid pKPN3-307\_typeA. In the CTX-M-15 column, \* indicates  $bla_{\text{CTX-M-15}}$  is inserted in chromosome, \*\*  $bla_{\text{CTX-M-15}}$  inserted in IncN plasmid; in the  $dfrA14$  column, \*  $dfrA27$  allele, \*\*  $dfrA12$  allele; in the KPC column, \* indicates  $bla_{\text{KPC-3}}$ , otherwise  $bla_{\text{KPC-2}}$  is present.
